# Supplementary material for: Technical note: A procedure to clean, decompose and aggregate time series
Source: Copernicus journal article supplement (doi:10.5194/hess-2021-609), 2021-12-17
Supplement: Supplementary file 1 [file hess-2021-609-supplement.pdf]

# Supplementary material of

## “A procedure to clean, decompose and aggregate univariate time series”

### Part I: Outliers

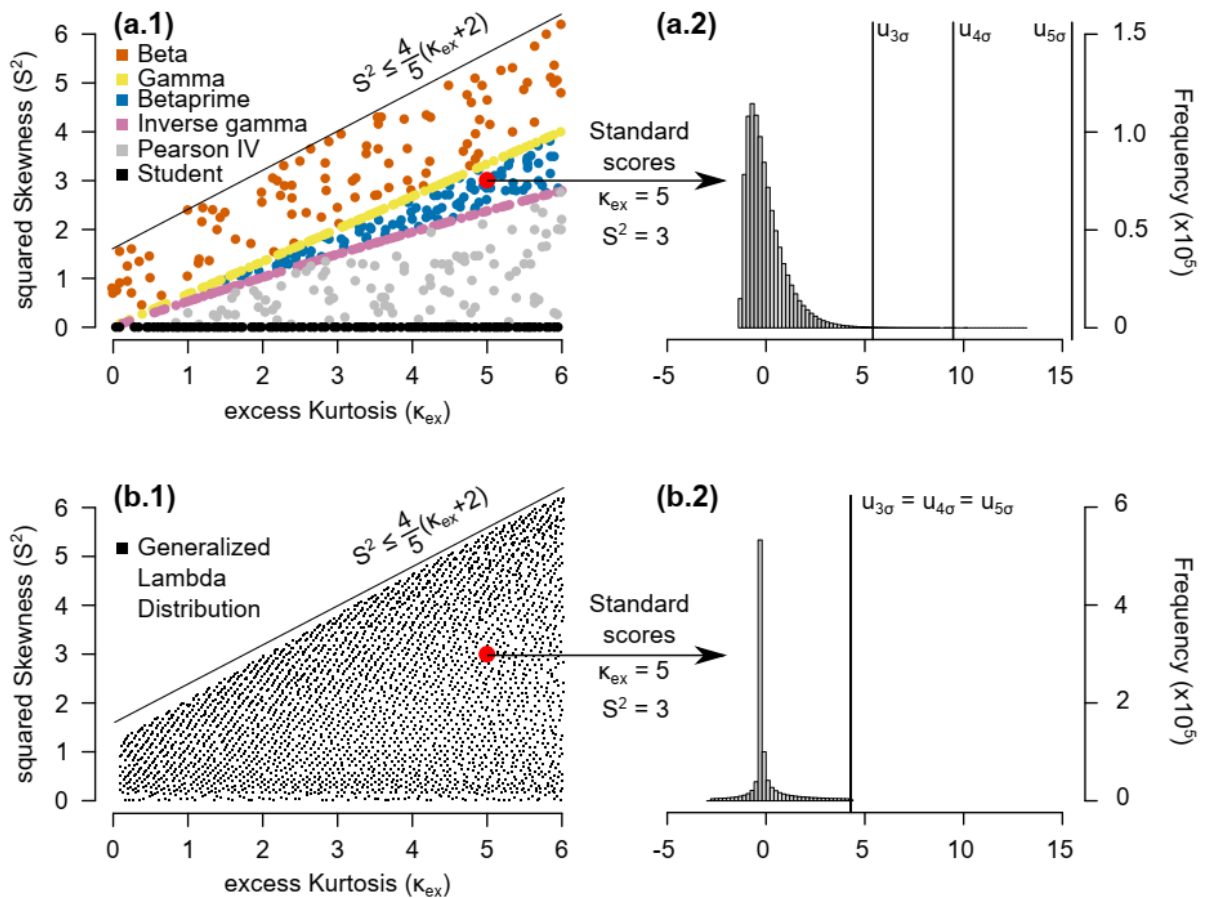

**Fig. S1.** Location of the 600 random distributions picked among the Pearson family in the  $(\kappa_{ex}, S^2)$  space (panel a.1). Example of the three upper thresholds based on the boxplot rule ( $u_{3\sigma}$ ,  $u_{4\sigma}$  and  $u_{5\sigma}$ ) to detect outliers for a Betaprime distribution with a skewness of 5 and a kurtosis of  $\sqrt{3}$  (panel a.2). The Generalized Lambda Distribution (GLD) system is shown for comparison in the  $(\kappa_{ex}, S^2)$  space (panel b.1). Similar figure than a.2 except for a distribution coming from the GLD system with a skewness of 5 and a kurtosis of  $\sqrt{3}$  (panel b.2).

- Figure 1 shows that the Generalized Lambda Distribution (GLD) system produces non-realistic outlier thresholds because each distribution from this system is bounded. The Pearson family is therefore preferred over the GLD system to model outlier behaviors.

## Part II: the *past* procedure

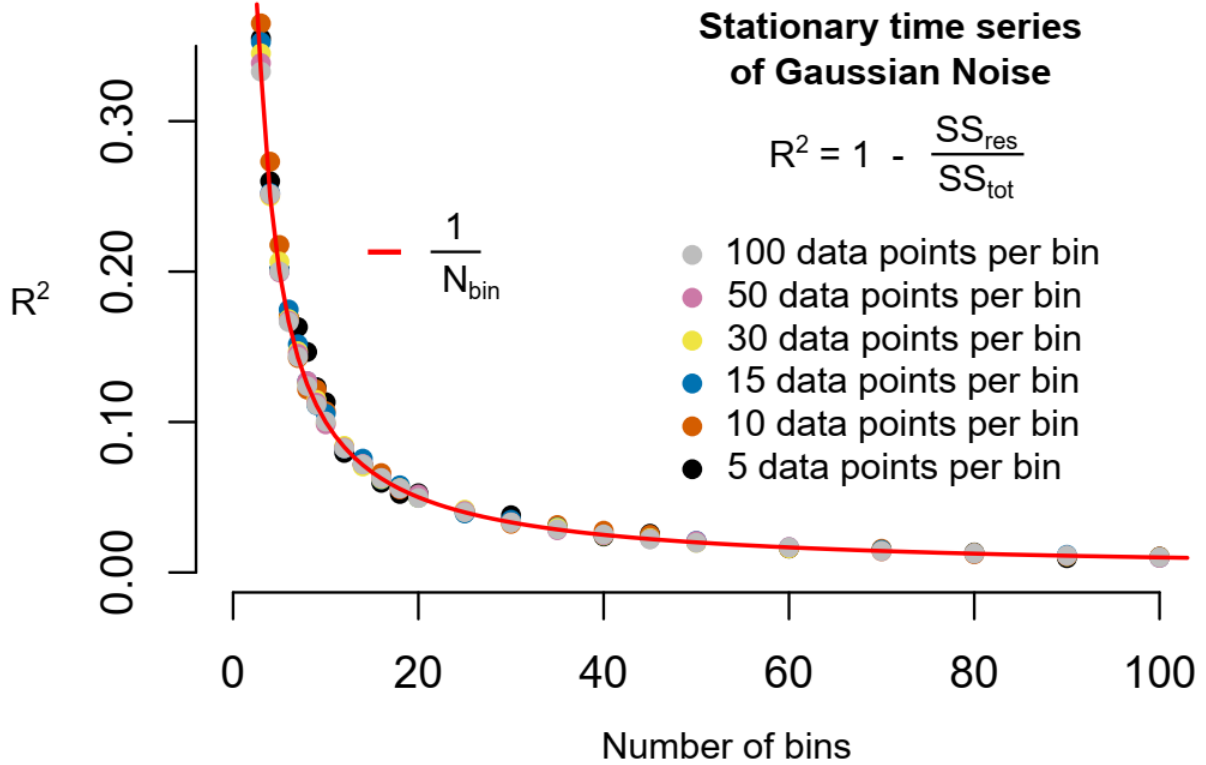

**Fig. S2.** The coefficient of determination ( $R^2$ ) has been calculated for multiple stationary time series of Gaussian noise  $y$ , with  $SS_{res} = \sum(y_i - S_i)^2$ ,  $SS_{tot} = \sum(y_i)^2$  and  $S$  the cyclic component calculated with the *past* procedure.

- Considering Fig. S2, an inverse relationship appears between the coefficient of determination calculated on a pure Gaussian noise and the number of bin used (related to the sample size). This relationship is independent from the number of points per bin (illustrated by different colors). Theoretically, a stationary timeseries has a null cyclicity ( $S = 0$ ,  $R^2 = 0$ ). While this is observed for a large number of bins ( $N_{bin} \gg 100$ ), a bias of  $N_{bin}^{-1}$  exists at a smaller amount and needs to be corrected. This justifies the definition of the stacked cycles index as  $SCI = R^2 - N_{bin}^{-1}$ .
